# Supplementary material for: An eco-friendly biomass pretreatment strategy utilizing reusable enzyme mimicking nanoparticles for lignin depolymerization and biofuel production
Source: Royal Society of Chemistry journal article supplement (doi:10.1039/d1gc01456k), 2021-01-01
Supplement: d1gc01456k1.pdf [file d1gc01456k1.pdf]

**An eco-friendly biomass pretreatment strategy utilizing reusable enzyme mimicking nanoparticles for lignin depolymerization and biofuel production**

Rajiv Chandra Rajak<sup>#</sup>, Pathikrit Saha<sup>#</sup>, Mamata Singhvi, Darae Kwak, Danil Kim, Huijeong Lee, Aarti R. Deshmukh, Yingjie Bu, Beom Soo Kim\*

Department of Chemical Engineering, Chungbuk National University, Cheongju, Chungbuk 28644, Republic of Korea

<sup>#</sup>Rajiv Chandra Rajak and Pathikrit Saha contributed equally to this work.

**\*Corresponding Author:**

Beom Soo Kim

Department of Chemical Engineering,

Chungbuk National University,

Cheongju, Chungbuk 28644, Republic of Korea

E-mail: [bskim@chungbuk.ac.kr](mailto:bskim@chungbuk.ac.kr)

Telephone No: +82-43-261-2372

## **Supporting Information**

### **S1: Synthesis of nanoparticles**

#### **Synthesis of CeONP**

Experiment was carried out according to the previous research with slight modification.<sup>1,2</sup> Chitosan (0.5 g) was added in 3% (w/v) acetic acid solution and dissolved completely. Afterwards, 1 g cerium nitrate hexahydrate was mixed with the chitosan-acetic acid solution for 1 h. Stoichiometric amount of H<sub>2</sub>O<sub>2</sub> was added dropwise to the solution and mixed thoroughly until the color turned from colorless to orange. Subsequently, the final solution was centrifuged at 15000 rpm for 30 min, followed by three times washing with water and ethanol. Finally, the recovered nanoparticles were freeze-dried and stored for further use.

#### **Synthesis of FeONP**

FeONP was synthesized as reported previously with slight modification.<sup>2</sup> Ammonia was added at 1:1 (v/v) ratio to distilled water along with 1 M FeCl<sub>2</sub> and 2 M FeCl<sub>3</sub>, followed by stirring at 60 °C overnight. The formed nanoparticles were washed with distilled water, followed by freeze drying.

#### **Synthesis of Ce-FeONP**

Ce-FeONP was obtained according to the previous study.<sup>3</sup> FeCl<sub>2</sub> and FeCl<sub>3</sub> were taken as 1:2 molar ratio in distilled water and mixed with ammonia solution (1:1, v/v) at 60 °C for 1 h. Subsequently, 5 wt% of cerium nitrate hexahydrate (against the wetight of FeCl<sub>3</sub> and FeCl<sub>2</sub>) was added to the solution and further mixed overnight. The formed nanoparticles were centrifuged at 15000 rpm for 30 min followed by washing with water and ethanol three times. Finally, the recovered nanoparticles were freeze-dried and stored for further use.

## Supplementary Figures

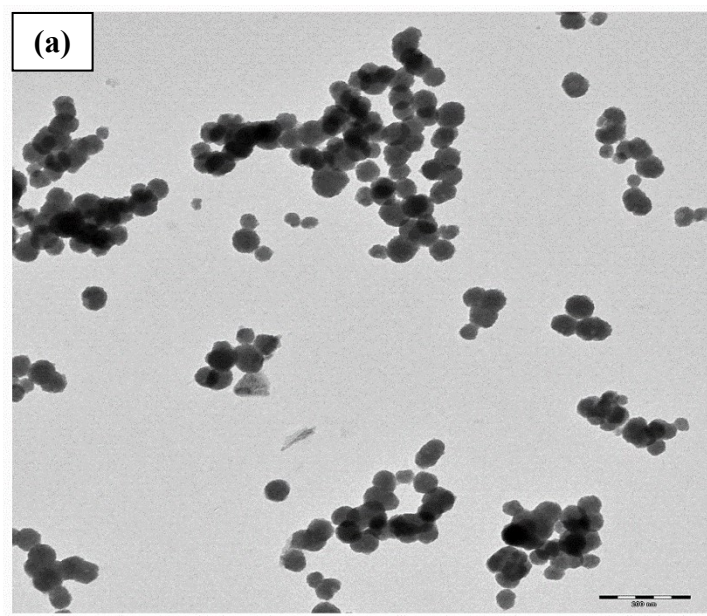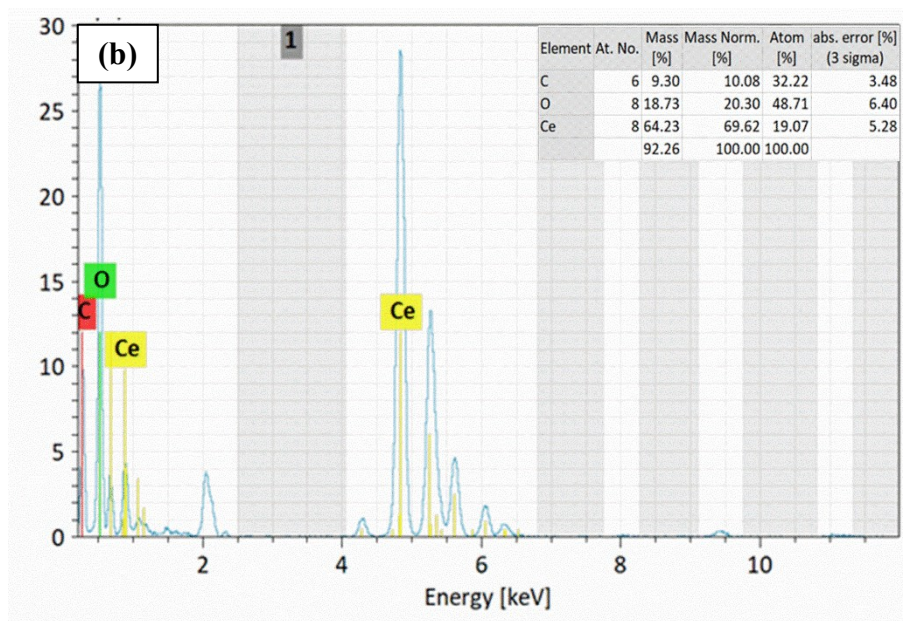

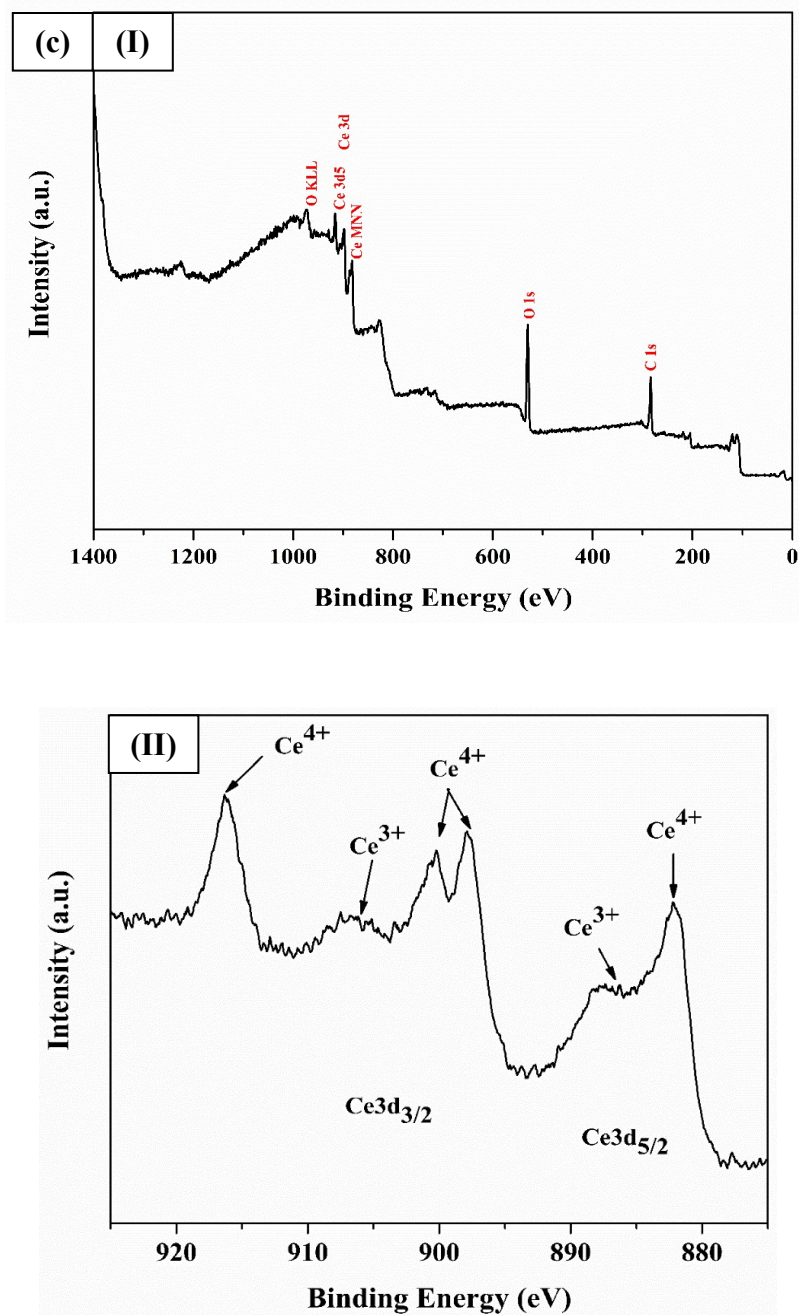

**Fig. S1.** (a) TEM images and (b) elemental compositional profile of synthesized CeONP, (c) XPS spectra: (I) survey of CeONP, (II) Ce3d XPS spectra of CeONP.

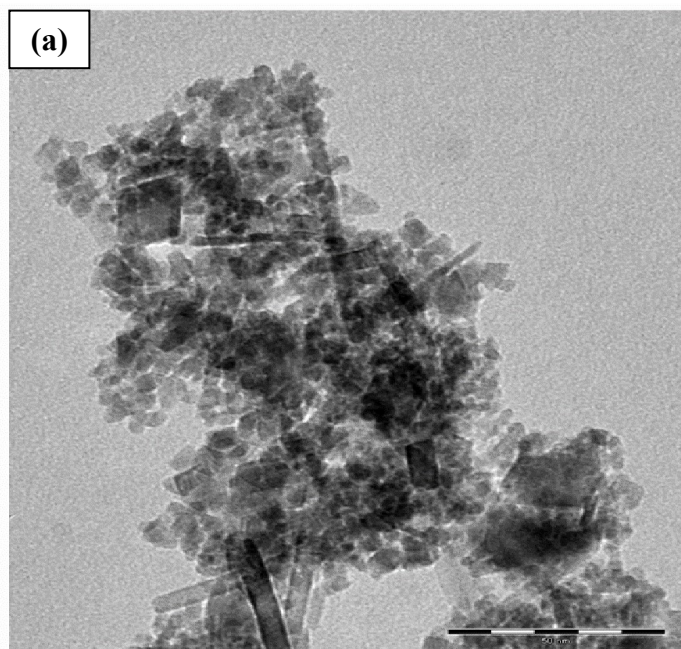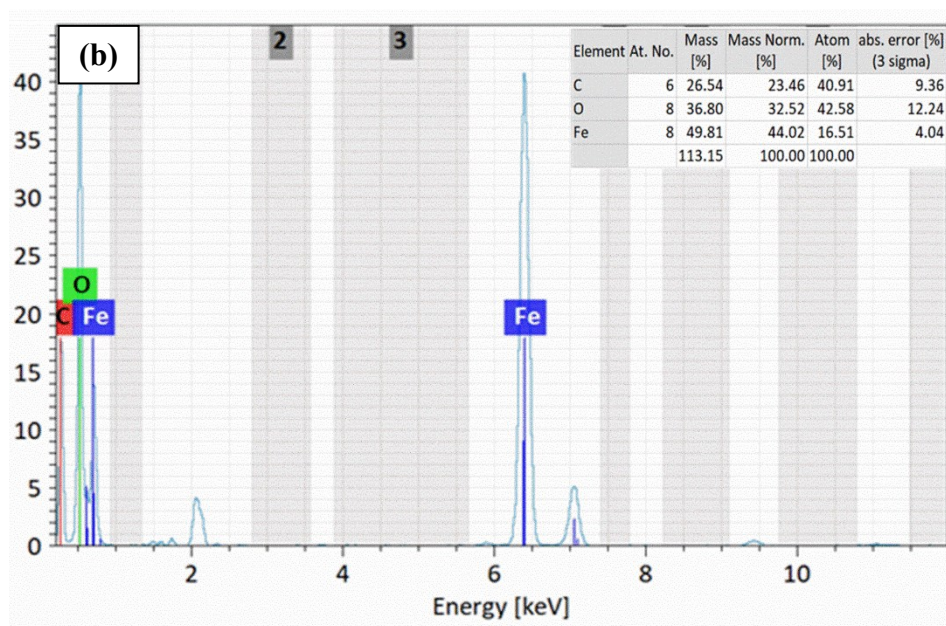

**Fig. S2.** (a) TEM image and (b) elemental composition of synthesized FeONP.



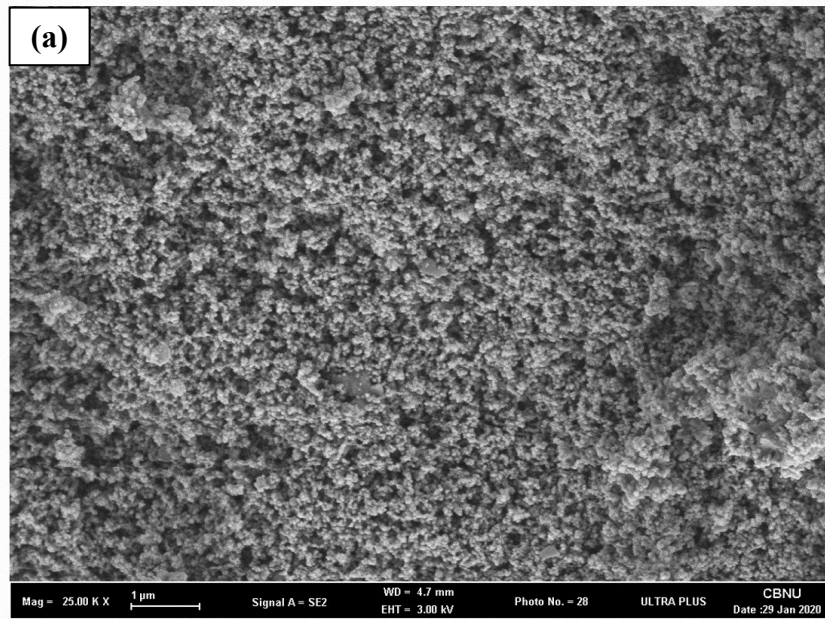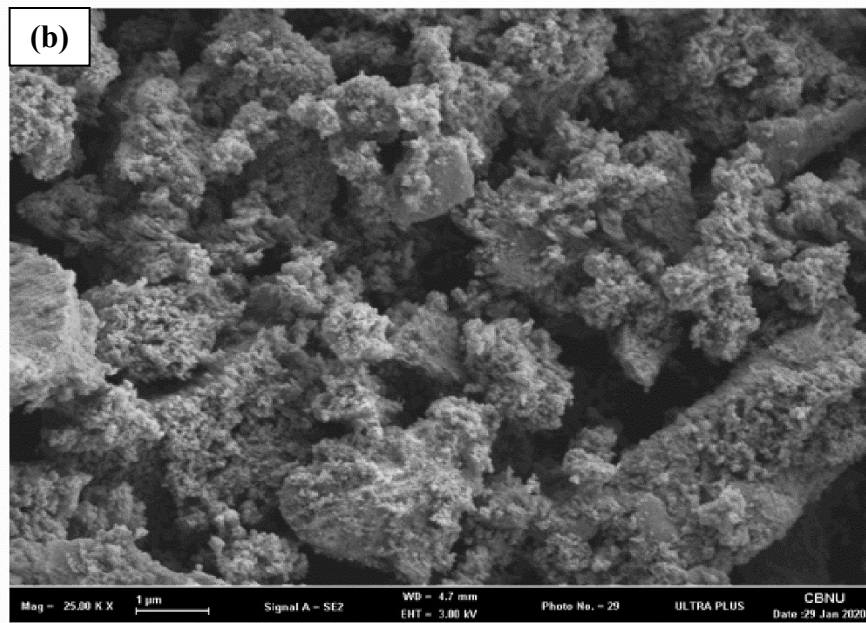

**Fig. S3.** Morphological images of synthesized (a) CeONP and (b) FeONP.

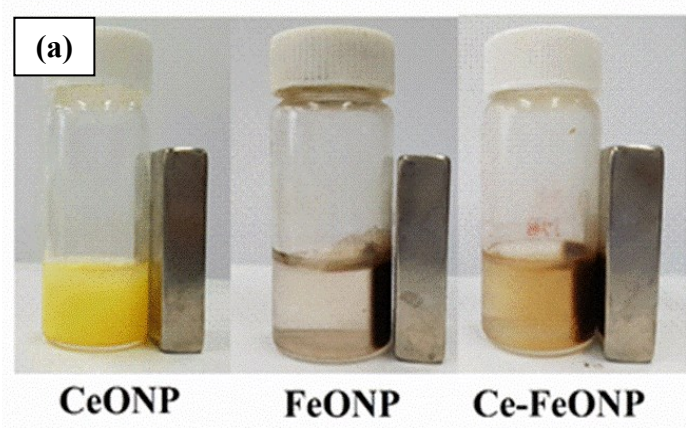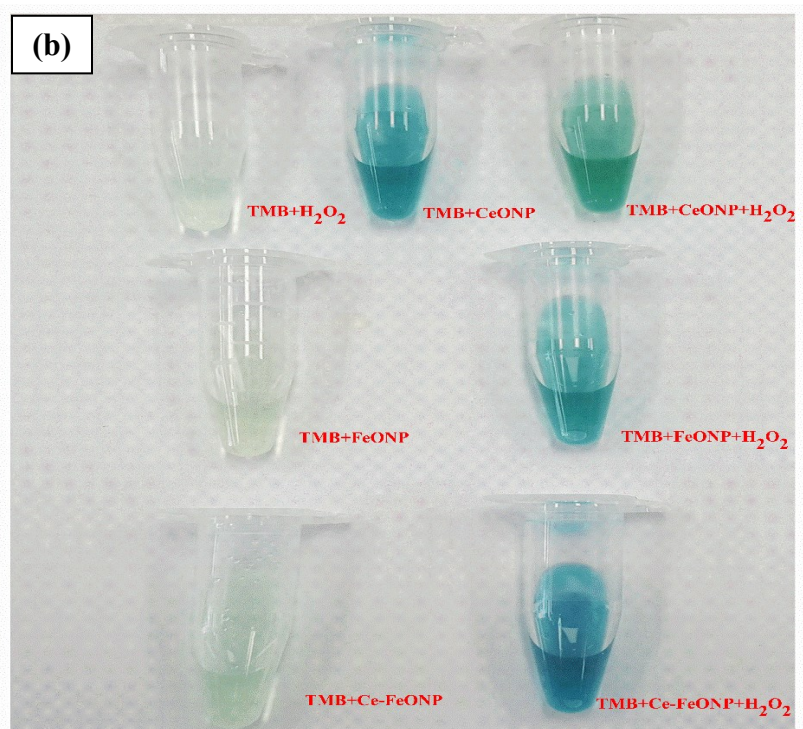

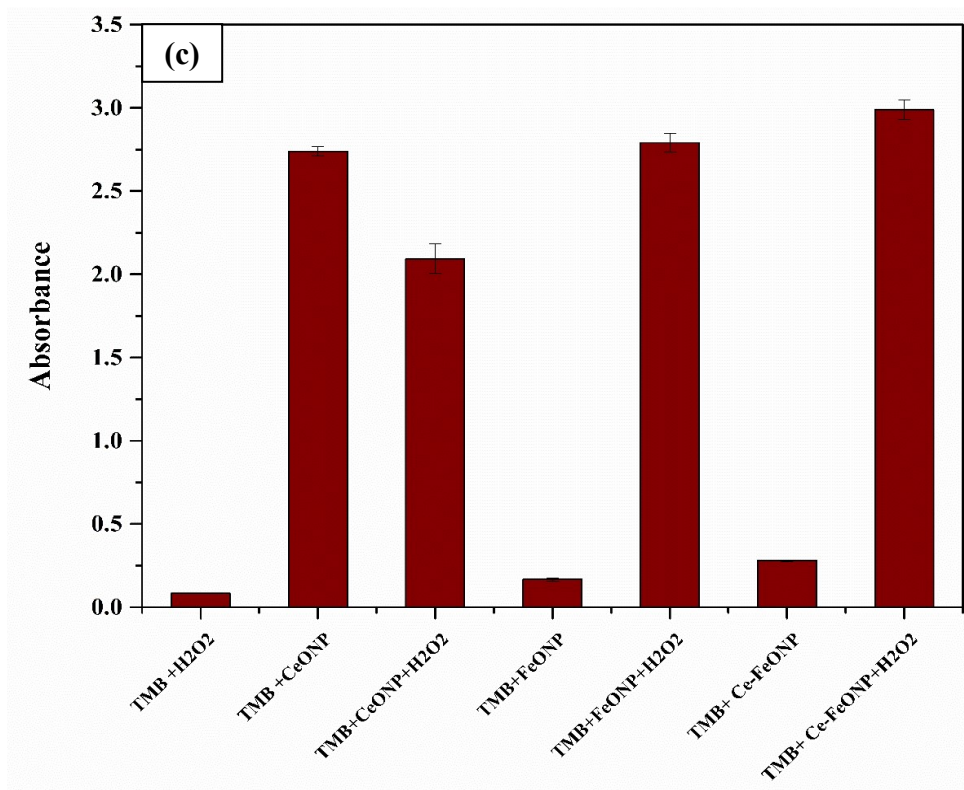

**Fig. S4.** (a) Magnetic property of synthesized CeONP, FeONP, and Ce-FeONP, (b) and (c) peroxidase assay of synthesized nanoparticles.



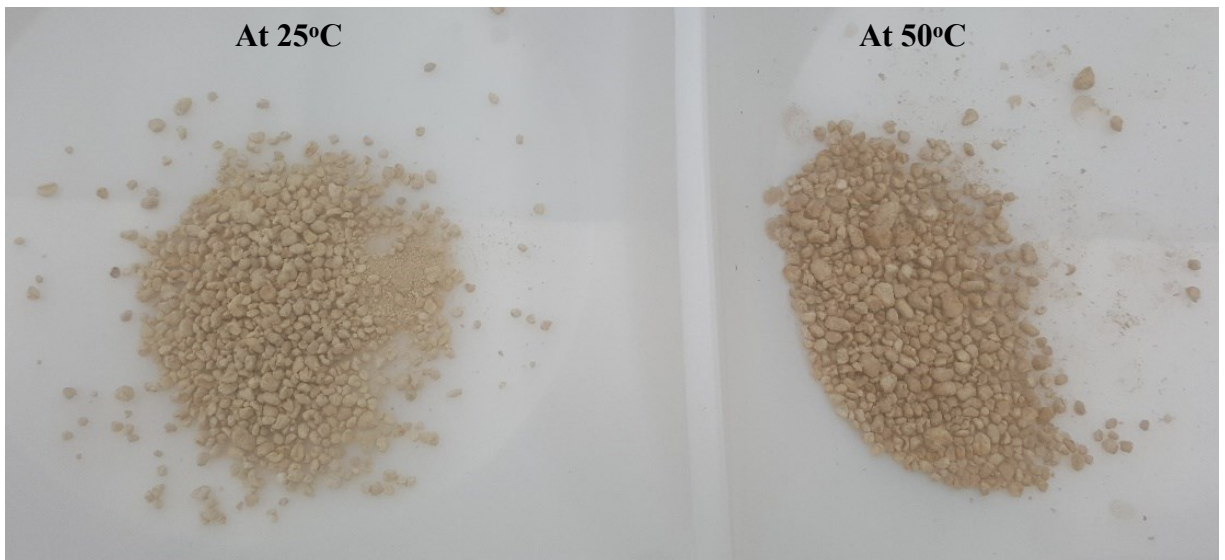

**Fig. S5.** Treated biomass after first washing at 25 °C and 50 °C.

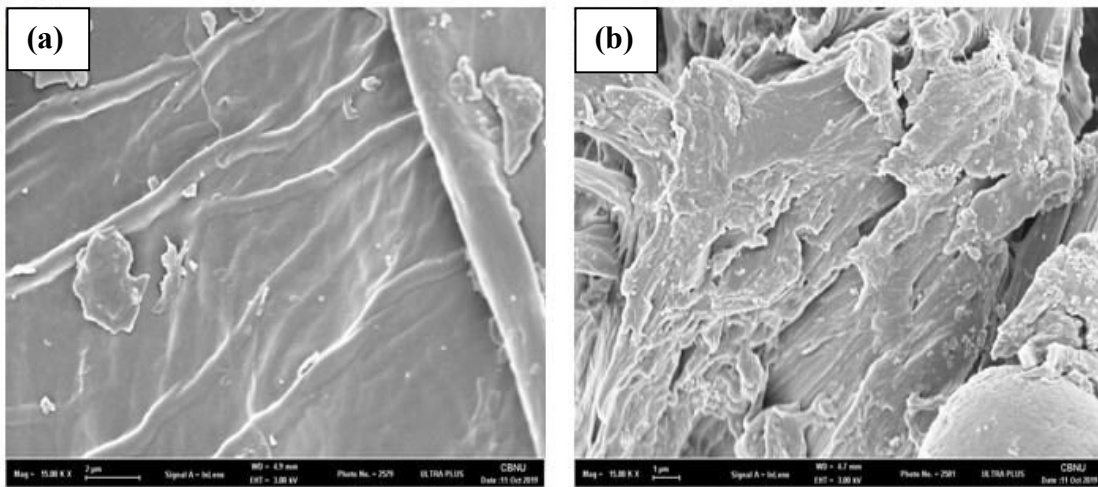

**Fig. S6.** SEM images of (a) raw and (b) pretreated corn cob biomass.

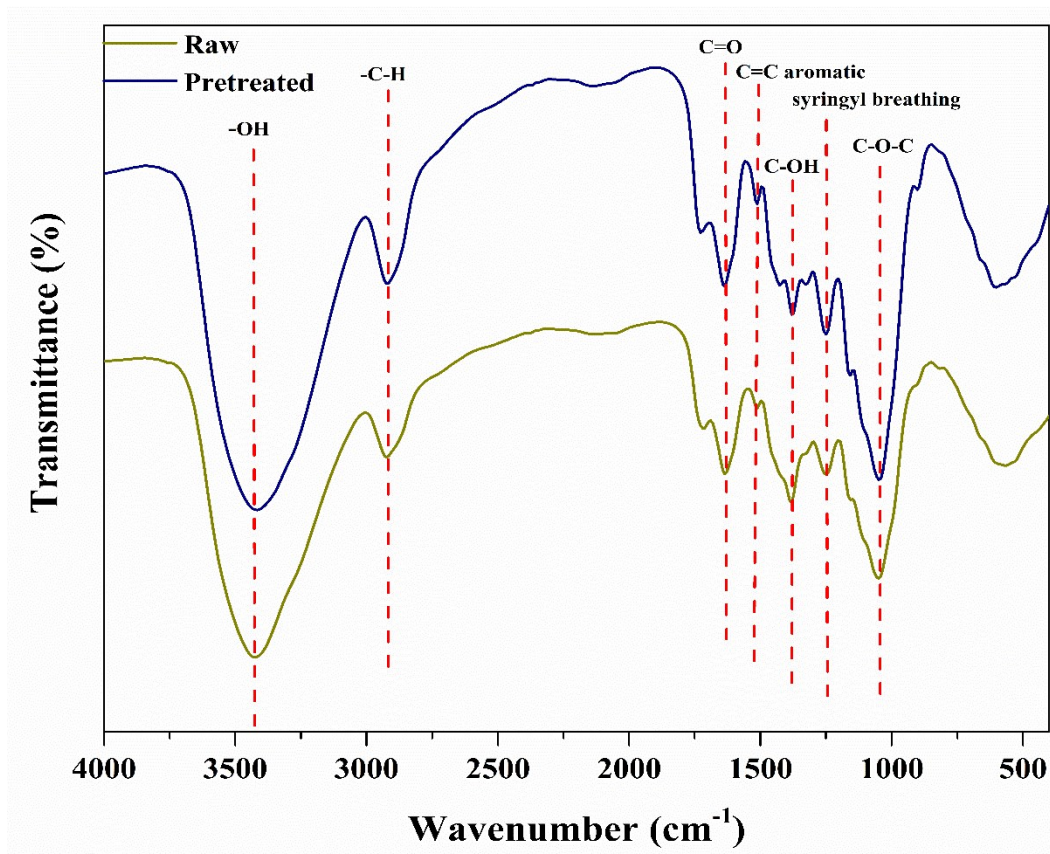

**Fig. S7.** FTIR spectra of raw and pretreated corn cob biomass.

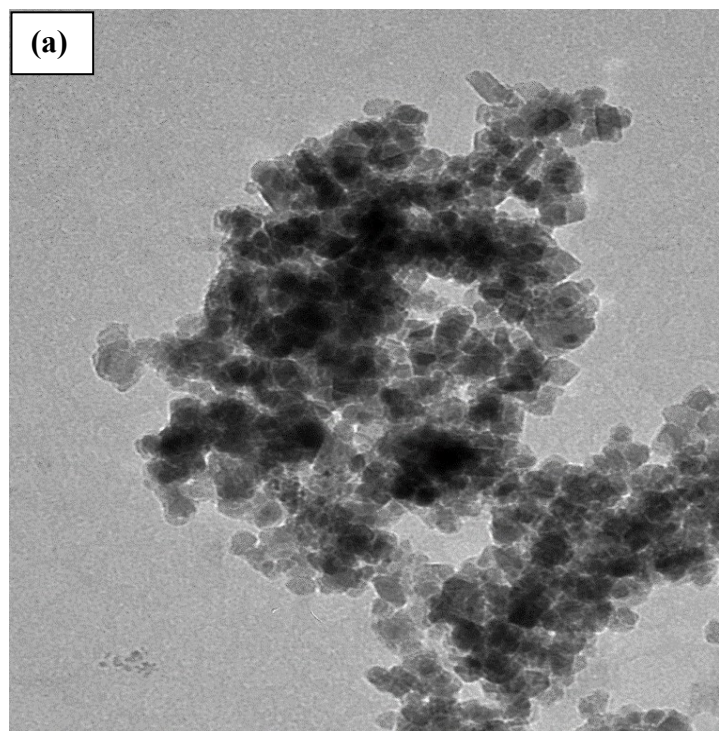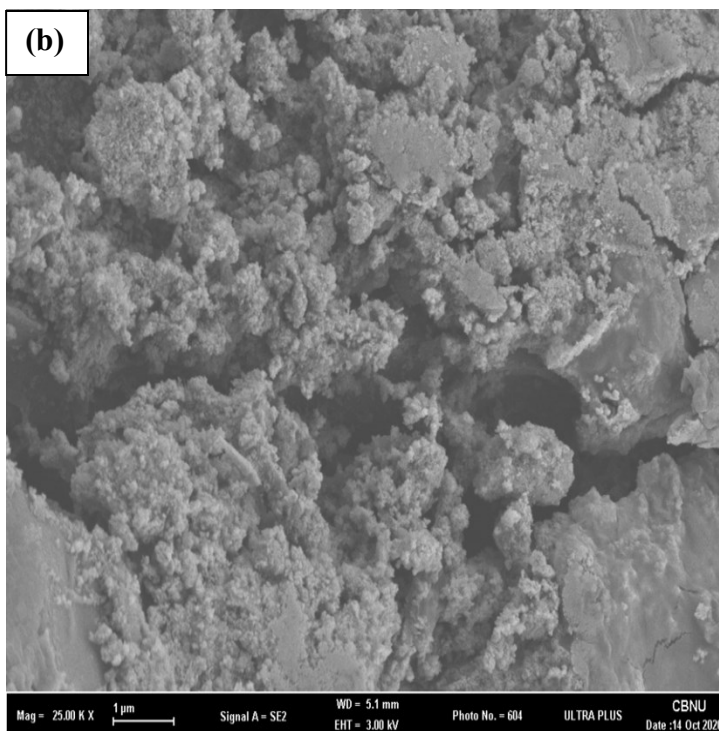

**Fig. S8.** (a) TEM and (b) SEM images of recovered Ce-FeONP.



## References

1. A. Kaushik, P. R. Solanki, M. K. Pandey, S. Ahmad and B. D. Malhotra, *Appl. Phys. Lett.*, 2009, **95**, 173703.
2. P. Saha, A. Maharjan, P. K. Dikshit and B. S. Kim, *Korean J. Chem. Eng.*, 2019, **36**, 2143-2152.
3. Aashima, S. Uppal, A. Arora, S. Gautam, S. Singh, R. J. Choudhury and S. K. Mehta, *RSC Adv.*, 2019, **9**, 23129.
